# Supplementary material
Source: publisher figshare collection journal article supplement (https://acs.figshare.com/ndownloader/files/34294101)
Supplement: Supplementary file 1 [file 34294101]

**Valence Band of Rutile TiO<sub>2</sub>(110) Investigated by  
Polarized Light Based Angle-Resolved Photoelectron  
Spectroscopy**

Shanshan Dong,<sup>a, d</sup> Shucai Xia,<sup>a, d</sup> Chao Wang,<sup>b</sup> Jingwei Dong,<sup>a</sup> Tianjun Wang,<sup>a</sup> Rui  
Li,<sup>b</sup> Zefeng Ren,<sup>a</sup> Dongxu Dai,<sup>a</sup> Xueming Yang<sup>a, c</sup>, Chuanyao Zhou<sup>a\*</sup>

a. State Key Laboratory of Molecular Reaction Dynamics, Dalian Institute of Chemical  
Physics, Chinese Academy of Science, 457 Zhongshan Road, Dalian, 116023, Liaoning,  
P. R. China

b. School of Optoelectronic Engineering and Instrumentation Science, Dalian  
University of Technology, Ganjingzi District, Dalian, 116024, Liaoning Province, P. R.  
China

c. Department of Chemistry, Southern University of Science and Technology, 1088  
Xueyuan Road, Shenzhen, Guangdong, 518055, P. R. China

d. University of Chinese Academy of Sciences, No.19A Yuquan Road, Shijingshan  
District, 100049, Beijing, P. R. China

<sup>\*)</sup> To whom all correspondence should be addressed:

[chuanyaozhou@dicp.ac.cn](mailto:chuanyaozhou@dicp.ac.cn)

Tel: +86-411-84379701

Fax: +86-411-84675584

|    |                                                                                                                      |     |
|----|----------------------------------------------------------------------------------------------------------------------|-----|
| 24 | Content                                                                                                              |     |
| 25 | 1. Experimental Details .....                                                                                        | S3  |
| 26 | 2. Molecular-orbital Bonding Structure and the Coordinate of Octahedral $\text{TiO}_6$ for Rutile $\text{TiO}_2$ ... | S5  |
| 27 | 3. Accessible $k_{\perp}$ at $\hbar\omega=42.5$ eV .....                                                             | S6  |
| 28 | 4. Determination of VBM's along $\overline{\Gamma\text{M}}$ and $\overline{\Gamma\text{Z}}$ .....                    | S7  |
| 29 | 5. Spectra at $\Gamma$ , $\text{M}$ and $k_{\parallel}=0.5 \text{ \AA}^{-1}$ .....                                   | S8  |
| 30 | 6. Previous ARPES Studies in the Surface/Bulk Brillouin Zone of Rutile $\text{TiO}_2(110)$ . ....                    | S10 |
| 31 | 7. The Predicted Detection Efficiency of $\sigma$ , $\pi$ , $\text{P}\pi$ Orbitals and Band Gap State. ....          | S11 |
| 32 | References:.....                                                                                                     | S13 |

33  
34  
35  
36  
37  
38  
39  
40  
41  
42  
43  
44  
45  
46  
47  
48  
49  
50  
51  
52  
53  
54  
55  
56  
57

## 1. Experimental Details

The ARPES experiments were performed in a  $\mu$ -metal UHV chamber (base pressure  $<3 \times 10^{-10}$  mbar) which is equipped with standard sample preparation and characterization devices.  $\text{TiO}_2(110)$  sample ( $10 \times 5 \times 1$  mm<sup>3</sup>, HF-Kejing), which was fixed on a grounded tantalum plate, was placed at the end of a five-axes manipulator, ensuring the X, Y and Z translation and polar and azimuthal rotation (around Z axis and the sample surface normal, respectively). It was cleaned by cycles of  $\text{Ar}^+$  sputtering and UHV annealing at 850 K, and the quality was confirmed by the sharp  $(1 \times 1)$  low electron energy diffraction (LEED) pattern and undetectable contamination in the Auger electron spectroscopy. The electrical connection of the bulk reduced  $\text{TiO}_2$  substrate and the tantalum plate aligns the Fermi level.

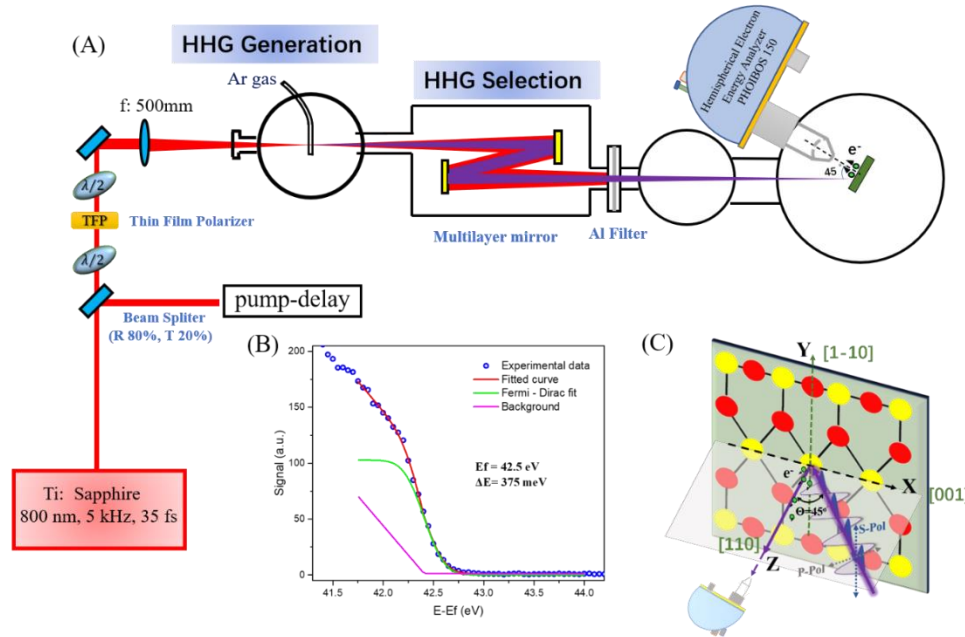

**Figure S1.** Schematic experimental configuration. (A) Optical layout for high-order harmonic generation and selection. (B) Overall energy resolution measured from a polycrystalline gold sample at 300 K. (C) Configuration of the  $\text{TiO}_2(110)$  sample, the electron energy analyzer and the polarization of the EUV light.

The EUV (extreme ultraviolet) light was produced through high-order harmonic generation (HHG) (Figure S1A), where 0.8 mJ output (800 nm, 35 fs, 5000 Hz) from a regenerative amplifier (Legend Elite Duo HE-USP; Coherent, Inc) was focused onto a stainless steel tube in the generation chamber. Ar gas was chosen as the media for HHG and the pressure was actively regulated by a mass controller. The resulted high-order harmonics propagate collinearly with the driving laser and pass through a two-mirror monochromator where the 27<sup>th</sup> order harmonic is selected. After transmitting the 200-nm thick aluminum foil, the selected EUV light was focused onto the TiO<sub>2</sub> sample surface at an incident angle of 45 degree.

Photoelectrons were collected by a hemispherical electron energy analyzer (Phoibos 150; SPECS) combined with a two-dimensional CCD camera. All the ARPES experiments were carried out at a sample temperature of 300 K to prevent residual H<sub>2</sub>O adsorption. The pass energy was set to 20 eV and the overall energy resolution was measured to be 375 meV from a polycrystalline gold sample (Figure S1B). The photon flux of the selected EUV, which could be tuned by varying the driving laser power, the focal condition and the Ar gas pressure, was optimized to maintain no space charge effect. The photon energy was then fitted by Fermi-Dirac distribution of the Fermi edge of the polycrystalline gold sample to be 42.5 eV. Polarization of the resulted EUV light, which follows that of the driving laser, could be changed by rotating the half wave plate in the optical path for 800 nm laser. Schematic configuration of the TiO<sub>2</sub>(110) sample, the electron energy analyzer and the polarization of the EUV light are shown in Figure S1C. The EUV light, the surface normal and the electron energy analyzer are placed in the XZ (horizontal) plane. The entrance slit of the analyzer was located along the X

axis, enabling the measurement of momentum-resolved electronic structure along this direction. P- and S-polarization mean that the electric field of the incident EUV light are along and perpendicular to the XZ plane, respectively.

## 2. Molecular-orbital Bonding Structure and the Coordinate of Octahedral $\text{TiO}_6$ for Rutile $\text{TiO}_2$

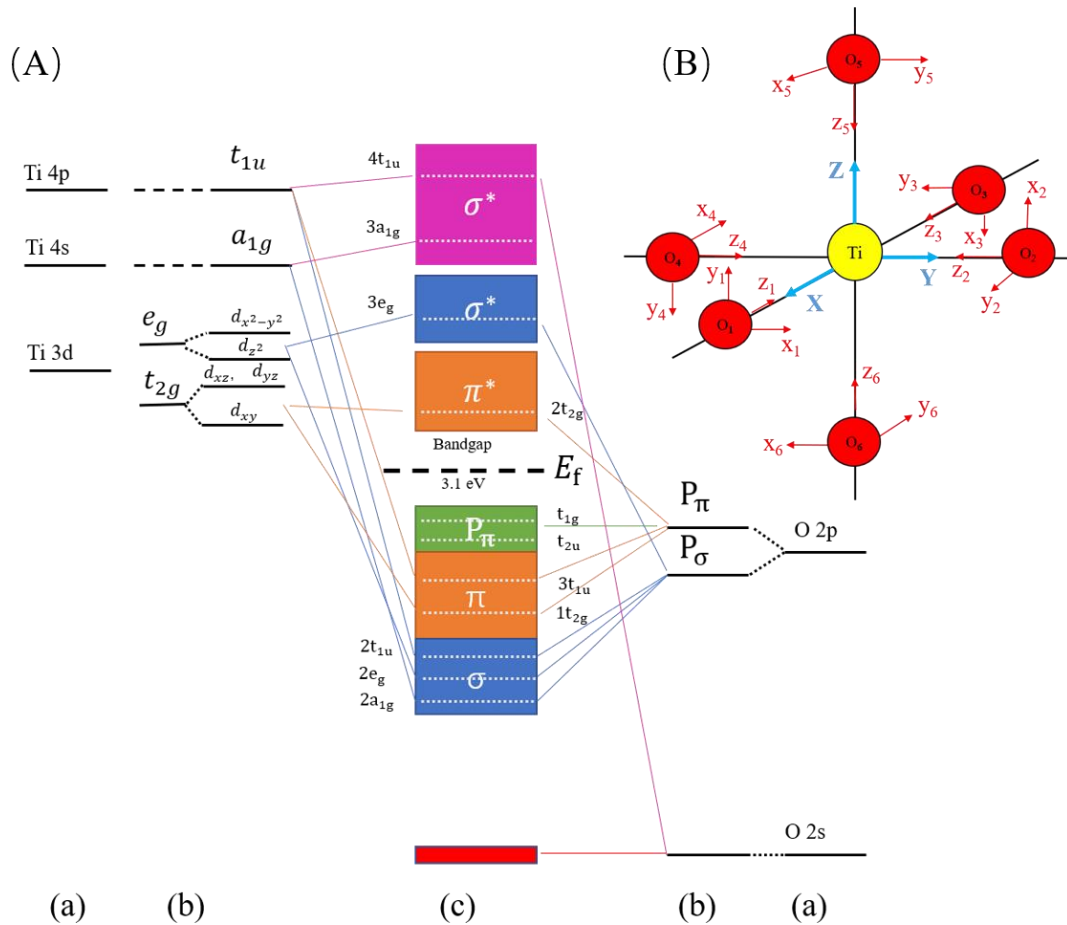

**Figure S2.** (A) Molecular-orbital bonding structure for Rutile  $\text{TiO}_2$ , (a) Ti atom levels, (b) crystal-field split levels, and (c) final interaction states. (B) The inset picture is the coordinate of octahedral  $\text{TiO}_6$ .<sup>1</sup>

### 3. Accessible $k_{\perp}$ at $h\nu=42.5$ eV

In a photoemission process from a crystal surface, the parallel component of the wavevector ( $k_{\parallel}$ ) is conserved but the perpendicular one ( $k_{\perp}$ ) is not. Then energy and parallel momentum conservation can be expressed as equation (1-3).<sup>2-3</sup>

$$k_{\parallel} = \sqrt{\frac{2m_0 \times E_{kin}}{\hbar^2}} \sin \theta \quad (1)$$

$$k_{\perp} = \sqrt{\frac{2m^*}{\hbar^2}} \sqrt{E_{kin} (\cos \theta)^2 + V_0} \quad (2)$$

$$E_{kin} = h\nu - \Phi - E_B \quad (3)$$

Where  $\theta$  is the emission angle, and  $E_{kin}$  is kinetic energy of the emitted free electrons with mass  $m_0$ . The effective mass  $m^*$  of the electrons is approximately  $1.35 m_0$ .<sup>4-5</sup>  $V_0$  is inner potential parameter with respect to the Fermi energy, and its value is about 15 eV.<sup>4-5</sup>  $\Phi$  is work function, which is approximately 4.8 eV for rutile  $\text{TiO}_2(110)$ .<sup>6</sup>  $E_B$  is the binding energy, which is between 0 and 10 eV in this work. According to equation 2, the accessible  $k_{\perp}$  is between  $0.390$  and  $0.433 \text{ \AA}^{-1}$  with a photon energy of 42.5 eV. For rutile  $\text{TiO}_2$ ,  $\Gamma M = 0.485 \text{ \AA}^{-1}$ . Therefore, the bands we measured are close to rather than exactly in the surface Brillouin zone.

#### 4. Determination of VBM's along $\overline{\Gamma\mathbf{M}}$ and $\overline{\Gamma\mathbf{Z}}$

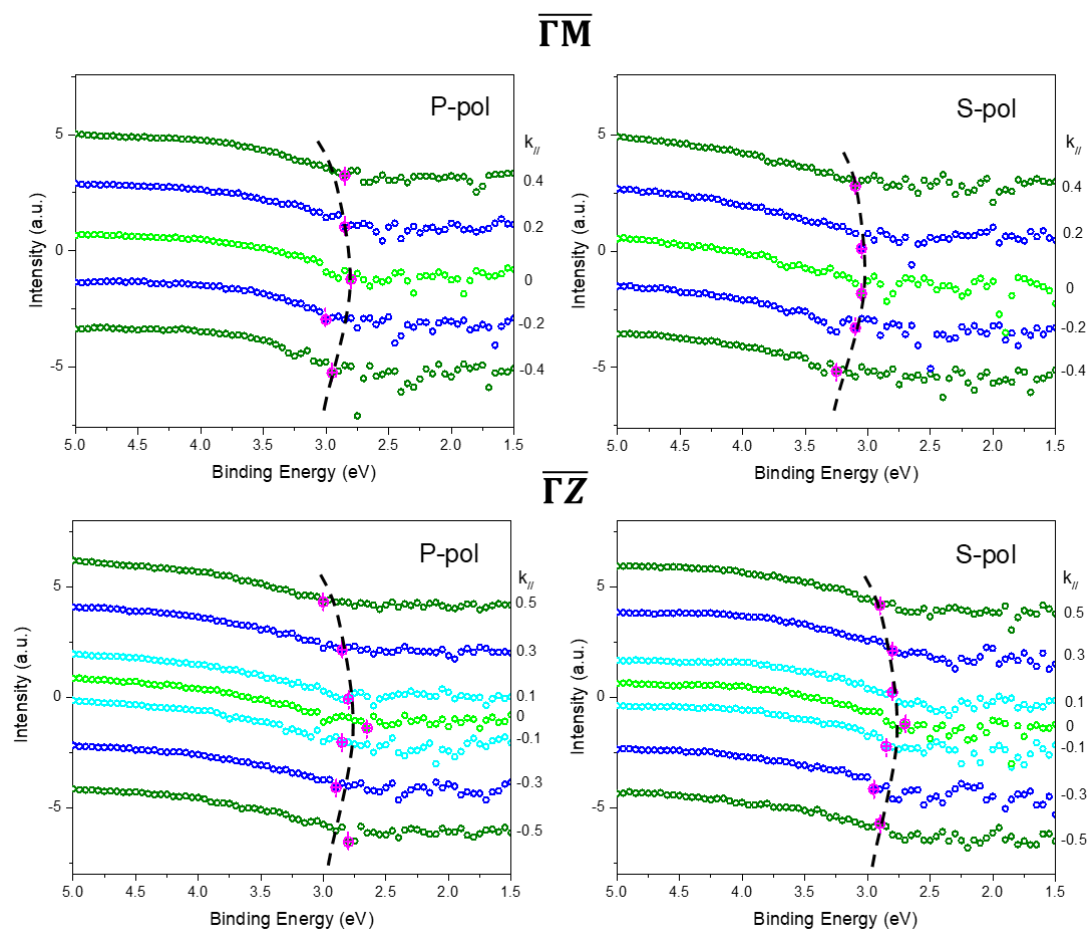

**Figure S3.** Momentum-integrated (in  $0.1 \text{ \AA}^{-1}$  range) EDC from Figure 1C-1F. The VBM along  $\overline{\Gamma\mathbf{M}}$  ( $k=-0.4\sim0.4 \text{ (1/\AA)}$ ) and  $\overline{\Gamma\mathbf{Z}}$  ( $k=-0.5\sim0.5 \text{ (1/\AA)}$ ) are determined by the kink of the spectra in the logarithmic representation.<sup>7</sup>

134 **5. Spectra at  $\bar{\Gamma}$ ,  $\bar{M}$  and  $k_{\parallel}=0.5 \text{ \AA}^{-1}$**

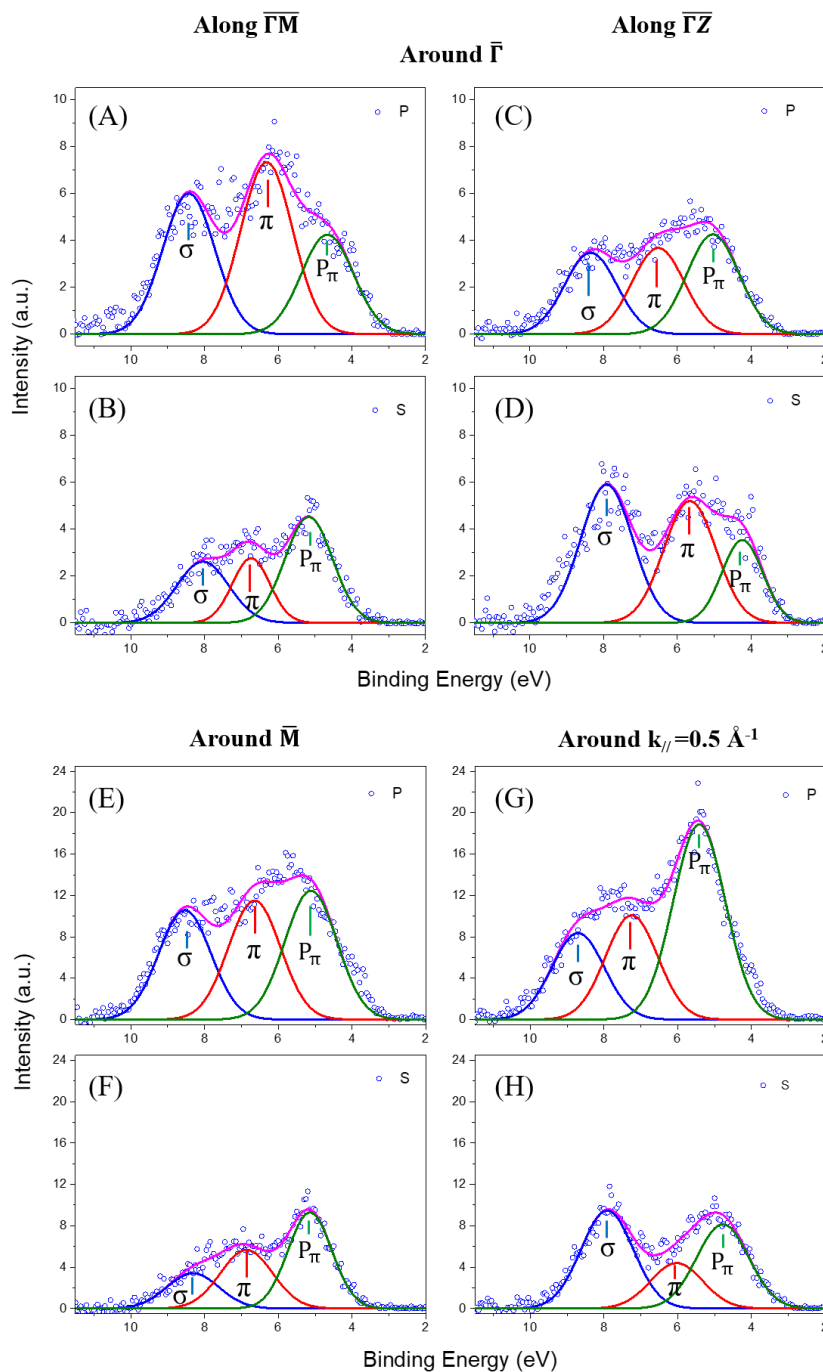

135

136 **Figure S4.** Momentum-integrated (in  $0.01 \text{ \AA}^{-1}$  range) EDC from Figure 2C-2F. Left and  
 137 right panels display the spectra along  $\bar{\Gamma M}$  and  $\bar{\Gamma Z}$  respectively. Polarization of the  
 138 excitation EUV light are indicated in each graph. Spectra in A-D are normalized at the  
 139 secondary electron edge, and those in E-H are normalized at  $E_B=20 \text{ eV}$ .



**Table S1.** Fitted center (eV), fitted and predicted intensity of  $\sigma$ ,  $\pi$  and  $P_\pi$  bands at  $\bar{\Gamma}$  point as a function of high symmetry direction and excitation light polarization.

| Orbitals | Along $\bar{\Gamma}\bar{M}$ ( $\bar{\Gamma}$ ) |      |                    |      |                     |      | Along $\bar{\Gamma}\bar{Z}$ ( $\bar{\Gamma}$ ) |      |                    |      |                     |      |
|----------|------------------------------------------------|------|--------------------|------|---------------------|------|------------------------------------------------|------|--------------------|------|---------------------|------|
|          | Center (eV)                                    |      | Measured Intensity |      | Predicted Intensity |      | Center (eV)                                    |      | Measured Intensity |      | Predicted Intensity |      |
|          | P                                              | S    | P                  | S    | P                   | S    | P                                              | S    | P                  | S    | P                   | S    |
| $\sigma$ | 8.42                                           | 8.04 | 1.00               | 0.43 | 1.00                | 0.44 | 8.34                                           | 7.91 | 0.58               | 0.98 | 1.03                | 0.28 |
| $\pi$    | 6.31                                           | 6.73 | 1.22               | 0.33 | 0.94                | 0.63 | 6.52                                           | 5.66 | 0.61               | 0.87 | 0.88                | 0.56 |
| $P_\pi$  | 4.66                                           | 5.17 | 0.71               | 0.69 | 0.39                | 0.26 | 5.03                                           | 4.24 | 0.71               | 0.46 | 0.32                | 0.32 |

**Table S2.** Fitted center (eV), fitted and predicted intensity of  $\sigma$ ,  $\pi$  and  $P_\pi$  bands at specified point as a function of excitation light polarization.

| Orbitals | Along $\bar{\Gamma}\bar{M}$ ( $\bar{M}$ ) |      |                    |      |                     |      | Along $\bar{\Gamma}\bar{Z}$ ( $k_\parallel=0.5$ 1/Å) |      |                    |      |                     |      |
|----------|-------------------------------------------|------|--------------------|------|---------------------|------|------------------------------------------------------|------|--------------------|------|---------------------|------|
|          | Center (eV)                               |      | Measured Intensity |      | Predicted Intensity |      | Center (eV)                                          |      | Measured Intensity |      | Predicted Intensity |      |
|          | P                                         | S    | P                  | S    | P                   | S    | P                                                    | S    | P                  | S    | P                   | S    |
| $\sigma$ | 8.53                                      | 8.32 | 1.76               | 0.57 | 1.00                | 0.44 | 8.47                                                 | 7.91 | 1.40               | 1.58 | 1.03                | 0.28 |
| $\pi$    | 6.65                                      | 6.86 | 1.92               | 0.94 | 0.94                | 0.63 | 6.90                                                 | 6.03 | 1.68               | 0.73 | 0.88                | 0.56 |
| $P_\pi$  | 5.12                                      | 5.14 | 2.08               | 1.30 | 0.39                | 0.26 | 5.35                                                 | 4.78 | 3.14               | 1.36 | 0.32                | 0.32 |

Fitted intensities are the relative peak area of the fitted bands. Predicted intensities are the relative detection efficiency of the molecular orbitals by  $h\nu=42.5$  eV light in an ideal  $\text{TiO}_6$  octahedron. Detailed calculations are described in the discussion section.

## 6. Previous ARPES Studies in the Surface/Bulk Brillouin Zone of Rutile TiO<sub>2</sub>(110).

**Table S3.** Comparison between ARPES measured bands of rutile TiO<sub>2</sub>. BZ stands for Brillouin zone. The values in the table are that at gamma points. The  $k_{\perp}$  is between 0.390 and 0.433 Å<sup>-1</sup> in our current work, close to rather than exactly in the surface Brillouin zone.

| Along $\overline{\Gamma M}$ ( $\overline{\Gamma}$ ) |                              | Along $\Gamma M$ ( $\Gamma$ ) |  | Along $\overline{\Gamma Z}$ ( $\overline{\Gamma}$ ) |                              |
|-----------------------------------------------------|------------------------------|-------------------------------|--|-----------------------------------------------------|------------------------------|
| Surface BZ                                          |                              | Bulk BZ                       |  | Surface BZ                                          |                              |
| Current work                                        | Fischer et al's <sup>4</sup> | Raika et al's <sup>8</sup>    |  | Current work                                        | Fischer et al's <sup>4</sup> |
| 8.42 ( $\sigma_p$ )                                 | /                            | 8.77 (F)                      |  | 8.43 ( $\sigma_p$ )                                 | 8.44 (F)                     |
| 8.06 ( $\sigma_s$ )                                 | 8.01 (F)                     | /                             |  | 7.93 ( $\sigma_s$ )                                 | /                            |
| 6.72 ( $\pi_s$ )                                    | 6.85 (E)                     | 7.24 (E)                      |  | 6.64 ( $\pi_p$ )                                    | 7.26 (E)                     |
| 6.31 ( $\pi_p$ )                                    | /                            | 6.34 (D)                      |  | 5.78 ( $\pi_s$ )                                    | 6.06 (C)                     |
| 5.20 ( $P_{\pi s}$ )                                | 5.85 (C)                     | 5.34 (C)                      |  | 5.11 ( $P_{\pi p}$ )                                | /                            |
| 4.67 ( $P_{\pi p}$ )                                | 4.72 (B)                     | 4.66 (B)                      |  | 4.36 ( $P_{\pi s}$ )                                | 4.74 (B)                     |

## 7. The Predicted Detection Efficiency of $\sigma$ , $\pi$ , $P_\pi$ Orbitals and Band Gap State.

**Table S4.** The predicted detection efficiency of  $\sigma$  orbitals. E, O and N correspond to even parity, odd parity, and no parity respectively.

| $\sigma$                              |                                  |                        | TiO <sub>6</sub> -[110]                         |                                                 |                                                 |                                                 | TiO <sub>6</sub> -[1-10]                        |                                                 |                                                 |                                                 |
|---------------------------------------|----------------------------------|------------------------|-------------------------------------------------|-------------------------------------------------|-------------------------------------------------|-------------------------------------------------|-------------------------------------------------|-------------------------------------------------|-------------------------------------------------|-------------------------------------------------|
|                                       | Orbitals                         |                        | Incident plane//[1-10]                          |                                                 | Incident plane//[001]                           |                                                 | Incident plane//[1-10]                          |                                                 | Incident plane//[001]                           |                                                 |
| <b>2A<sub>1g</sub></b>                | Ti                               | O                      | P(E)                                            | S(O)                                            | P(E)                                            | S(O)                                            | P(E)                                            | S(O)                                            | P(E)                                            | S(O)                                            |
| $\sigma_1$                            | 4s                               | O <sub>1-4</sub> , 2pz | E( $\sqrt{}$ )E( $\sqrt{}$ ),<br>E( $\sqrt{}$ ) | E( $\times$ )E( $\times$ ),<br>E( $\times$ )    | E( $\sqrt{}$ )E( $\sqrt{}$ ),<br>E( $\sqrt{}$ ) | E( $\times$ )E( $\times$ ),<br>E( $\times$ )    | E( $\sqrt{}$ )E( $\sqrt{}$ ),<br>E( $\sqrt{}$ ) | E( $\times$ )E( $\times$ ),<br>E( $\times$ )    | E( $\sqrt{}$ )E( $\sqrt{}$ ),<br>E( $\sqrt{}$ ) | E( $\times$ )E( $\times$ ),<br>E( $\times$ )    |
|                                       |                                  |                        | 0.4                                             | 0                                               | 0.4                                             | 0                                               | 0.4                                             | 0                                               | 0.4                                             | 0                                               |
| $\sigma_2$                            | 4s                               | O <sub>5-6</sub> , 2pz | E( $\sqrt{}$ )E( $\sqrt{}$ ),<br>E( $\sqrt{}$ ) | E( $\times$ )E( $\times$ ),<br>E( $\times$ )    | E( $\sqrt{}$ )E( $\sqrt{}$ ),<br>E( $\sqrt{}$ ) | E( $\times$ )E( $\times$ ),<br>E( $\times$ )    | E( $\sqrt{}$ )E( $\sqrt{}$ ),<br>E( $\sqrt{}$ ) | E( $\times$ )E( $\times$ ),<br>E( $\times$ )    | E( $\sqrt{}$ )E( $\sqrt{}$ ),<br>E( $\sqrt{}$ ) | E( $\times$ )E( $\times$ ),<br>E( $\times$ )    |
| <b>2E<sub>g</sub></b>                 |                                  |                        | 0.4                                             | 0                                               | 0.4                                             | 0                                               | 0.4                                             | 0                                               | 0.4                                             | 0                                               |
| $\sigma_3$                            | 3dz <sup>2</sup>                 | O <sub>1-4</sub> , 2pz | E( $\sqrt{}$ )E( $\sqrt{}$ ),<br>E( $\sqrt{}$ ) | E( $\times$ )E( $\times$ ),<br>E( $\times$ )    | E( $\sqrt{}$ )E( $\sqrt{}$ ),<br>E( $\sqrt{}$ ) | E( $\times$ )E( $\times$ ),<br>E( $\times$ )    | E( $\sqrt{}$ )E( $\sqrt{}$ ),<br>E( $\sqrt{}$ ) | E( $\times$ )E( $\times$ ),<br>E( $\times$ )    | E( $\sqrt{}$ )E( $\sqrt{}$ ),<br>E( $\sqrt{}$ ) | E( $\times$ )E( $\times$ ),<br>E( $\times$ )    |
|                                       |                                  |                        | 0.6                                             | 0                                               | 0.6                                             | 0                                               | 0.6                                             | 0                                               | 0.6                                             | 0                                               |
| $\sigma_4$                            | 3dz <sup>2</sup>                 | O <sub>5-6</sub> , 2pz | E( $\sqrt{}$ )E( $\sqrt{}$ ),<br>E( $\sqrt{}$ ) | E( $\times$ )E( $\times$ ),<br>E( $\times$ )    | E( $\sqrt{}$ )E( $\sqrt{}$ ),<br>E( $\sqrt{}$ ) | E( $\times$ )E( $\times$ ),<br>E( $\times$ )    | E( $\sqrt{}$ )E( $\sqrt{}$ ),<br>E( $\sqrt{}$ ) | E( $\times$ )E( $\times$ ),<br>E( $\times$ )    | E( $\sqrt{}$ )E( $\sqrt{}$ ),<br>E( $\sqrt{}$ ) | E( $\times$ )E( $\times$ ),<br>E( $\times$ )    |
|                                       |                                  |                        | 0.6                                             | 0                                               | 0.6                                             | 0                                               | 0.6                                             | 0                                               | 0.6                                             | 0                                               |
| $\sigma_5$                            | 3dx <sup>2</sup> -y <sup>2</sup> | O <sub>1-4</sub> , 2pz | O( $\times$ )O( $\times$ ),<br>O( $\times$ )    | O( $\sqrt{}$ )O( $\sqrt{}$ ),<br>O( $\sqrt{}$ ) | O( $\times$ )O( $\times$ ),<br>O( $\times$ )    | O( $\sqrt{}$ )O( $\sqrt{}$ ),<br>O( $\sqrt{}$ ) | O( $\times$ )O( $\times$ ),<br>O( $\times$ )    | O( $\sqrt{}$ )O( $\sqrt{}$ ),<br>O( $\sqrt{}$ ) | E( $\sqrt{}$ )E( $\sqrt{}$ ),<br>E( $\sqrt{}$ ) | E( $\times$ )E( $\times$ ),<br>E( $\times$ )    |
| <b>2T<sub>1u</sub></b>                |                                  |                        | 0                                               | 0.6                                             | 0                                               | 0.6                                             | 0                                               | 0.6                                             | 0.6                                             | 0                                               |
| $\sigma_6$                            | 4px                              | O <sub>1,3</sub> , 2pz | N( $\sqrt{}$ )N( $\sqrt{}$ ),<br>N( $\sqrt{}$ ) | E( $\sqrt{}$ )E( $\sqrt{}$ ),<br>E( $\sqrt{}$ ) | E( $\times$ )E( $\times$ ),<br>E( $\times$ )    |
|                                       |                                  |                        | 0.4                                             | 0.4                                             | 0.4                                             | 0.4                                             | 0.4                                             | 0.4                                             | 0.4                                             | 0                                               |
| $\sigma_7$                            | 4py                              | O <sub>2,4</sub> , 2pz | N( $\sqrt{}$ )N( $\sqrt{}$ ),<br>N( $\sqrt{}$ ) | E( $\sqrt{}$ )E( $\sqrt{}$ ),<br>E( $\sqrt{}$ ) | E( $\times$ )E( $\times$ ),<br>E( $\times$ )    |
|                                       |                                  |                        | 0.4                                             | 0.4                                             | 0.4                                             | 0.4                                             | 0.4                                             | 0.4                                             | 0.4                                             | 0                                               |
| $\sigma_8$                            | 4pz                              | O <sub>5,6</sub> , 2pz | E( $\sqrt{}$ )E( $\sqrt{}$ ),<br>E( $\sqrt{}$ ) | E( $\times$ )E( $\times$ ),<br>E( $\times$ )    | E( $\sqrt{}$ )E( $\sqrt{}$ ),<br>E( $\sqrt{}$ ) | E( $\times$ )E( $\times$ ),<br>E( $\times$ )    | E( $\sqrt{}$ )E( $\sqrt{}$ ),<br>E( $\sqrt{}$ ) | E( $\times$ )E( $\times$ ),<br>E( $\times$ )    | O( $\times$ )O( $\times$ ),<br>O( $\times$ )    | O( $\sqrt{}$ )O( $\sqrt{}$ ),<br>O( $\sqrt{}$ ) |
|                                       |                                  |                        | 0.4                                             | 0                                               | 0.4                                             | 0                                               | 0.4                                             | 0                                               | 0                                               | 0.4                                             |
| <b>Predicted detection efficiency</b> |                                  |                        | <b>Incident plane//[1-10]</b>                   |                                                 |                                                 |                                                 | <b>Incident plane//[001]</b>                    |                                                 |                                                 |                                                 |
|                                       |                                  |                        | <b>P:S=1 : 0.44</b>                             |                                                 |                                                 |                                                 | <b>P:S=1.03 : 0.28</b>                          |                                                 |                                                 |                                                 |

**Table S5.** The predicted detection efficiency of  $\pi$  orbitals. E, O and N correspond to even parity, odd parity, and no parity respectively.

| $\pi$                                 |                  |                                                   | TiO <sub>6</sub> -[110]                                  |                                                          |                                                          |                                                          | TiO <sub>6</sub> -[1-10]                                 |                                                          |                                                          |                                                          |
|---------------------------------------|------------------|---------------------------------------------------|----------------------------------------------------------|----------------------------------------------------------|----------------------------------------------------------|----------------------------------------------------------|----------------------------------------------------------|----------------------------------------------------------|----------------------------------------------------------|----------------------------------------------------------|
|                                       | Orbitals         |                                                   | Incident plane//[1-10]                                   |                                                          | Incident plane//[001]                                    |                                                          | Incident plane//[1-10]                                   |                                                          | Incident plane//[001]                                    |                                                          |
| <b>1T<sub>2g</sub></b>                | Ti               | O                                                 | P(E)                                                     | S(O)                                                     | P(E)                                                     | S(O)                                                     | P(E)                                                     | S(O)                                                     | P(E)                                                     | S(O)                                                     |
| $\pi 1$                               | 3d <sub>xy</sub> | O <sub>1,4</sub> , 2px,<br>O <sub>2,3</sub> , 2py | E( $\checkmark$ )E( $\checkmark$ ),<br>E( $\checkmark$ ) | E( $\times$ )E( $\times$ ),<br>E( $\times$ )             | E( $\checkmark$ )E( $\checkmark$ ),<br>E( $\checkmark$ ) | E( $\times$ )E( $\times$ ),<br>E( $\times$ )             | E( $\checkmark$ )E( $\checkmark$ ),<br>E( $\checkmark$ ) | E( $\times$ )E( $\times$ ),<br>E( $\times$ )             | E( $\checkmark$ )E( $\checkmark$ ),<br>E( $\checkmark$ ) | E( $\times$ )E( $\times$ ),<br>E( $\times$ )             |
|                                       |                  |                                                   | 0.6                                                      | 0                                                        | 0.6                                                      | 0                                                        | 0.6                                                      | 0                                                        | 0.6                                                      | 0                                                        |
| $\pi 2$                               | 3d <sub>yz</sub> | O <sub>2,6</sub> , 2px,<br>O <sub>4,5</sub> , 2py | N( $\checkmark$ )N( $\checkmark$ ),<br>N( $\checkmark$ ) |
|                                       |                  |                                                   | 0.6                                                      | 0.6                                                      | 0.6                                                      | 0.6                                                      | 0.6                                                      | 0.6                                                      | 0.6                                                      | 0.6                                                      |
| $\pi 3$                               | 3d <sub>xz</sub> | O <sub>3,5</sub> , 2px,<br>O <sub>1,6</sub> , 2py | N( $\checkmark$ )N( $\checkmark$ ),<br>N( $\checkmark$ ) |
| <b>3T<sub>1g</sub></b>                |                  |                                                   | 0.6                                                      | 0.6                                                      | 0.6                                                      | 0.6                                                      | 0.6                                                      | 0.6                                                      | 0.6                                                      | 0.6                                                      |
| $\pi 4$                               | 4px              | O <sub>2,6</sub> , 2py,<br>O <sub>4,5</sub> , 2px | N( $\checkmark$ )N( $\checkmark$ ),<br>N( $\checkmark$ ) | E( $\checkmark$ )E( $\checkmark$ ),<br>E( $\checkmark$ ) | E( $\times$ )E( $\times$ ),<br>E( $\times$ )             |
|                                       |                  |                                                   | 0.4                                                      | 0.4                                                      | 0.4                                                      | 0.4                                                      | 0.4                                                      | 0.4                                                      | 0.4                                                      | 0                                                        |
| $\pi 5$                               | 4py              | O <sub>1,6</sub> , 2px,<br>O <sub>3,5</sub> , 2py | N( $\checkmark$ )N( $\checkmark$ ),<br>N( $\checkmark$ ) | E( $\checkmark$ )E( $\checkmark$ ),<br>E( $\checkmark$ ) | E( $\times$ )E( $\times$ ),<br>E( $\times$ )             |
|                                       |                  |                                                   | 0.4                                                      | 0.4                                                      | 0.4                                                      | 0.4                                                      | 0.4                                                      | 0.4                                                      | 0.4                                                      | 0                                                        |
| $\pi 6$                               | 4pz              | O <sub>1,4</sub> , 2py,<br>O <sub>2,3</sub> , 2px | E( $\checkmark$ )E( $\checkmark$ ),<br>E( $\checkmark$ ) | E( $\times$ )E( $\times$ ),<br>E( $\times$ )             | E( $\checkmark$ )E( $\checkmark$ ),<br>E( $\checkmark$ ) | E( $\times$ )E( $\times$ ),<br>E( $\times$ )             | E( $\checkmark$ )E( $\checkmark$ ),<br>E( $\checkmark$ ) | E( $\times$ )E( $\times$ ),<br>E( $\times$ )             | O( $\times$ )O( $\times$ ),<br>O( $\times$ )             | O( $\checkmark$ )O( $\checkmark$ ),<br>O( $\checkmark$ ) |
|                                       |                  |                                                   | 0.4                                                      | 0                                                        | 0.4                                                      | 0                                                        | 0.4                                                      | 0                                                        | 0                                                        | 0.4                                                      |
| <b>Predicted detection efficiency</b> |                  |                                                   | <b>Incident plane//[1-10]</b><br><b>P:S=0.94 : 0.63</b>  |                                                          |                                                          |                                                          | <b>Incident plane//[001]</b><br><b>P:S=0.88 : 0.56</b>   |                                                          |                                                          |                                                          |

**Table S6.** The predicted detection efficiency of  $P_{\pi}$  orbitals. E, O and N correspond to even parity, odd parity, and no parity respectively.

| $P_{\pi}$                             | <b>T<sub>2u</sub>/T<sub>1g</sub></b> |                                                   | TiO <sub>6</sub> -[110]                                 |                                        |                                        |                                        | TiO <sub>6</sub> -[1-10]                               |                                        |                                        |                                        |
|---------------------------------------|--------------------------------------|---------------------------------------------------|---------------------------------------------------------|----------------------------------------|----------------------------------------|----------------------------------------|--------------------------------------------------------|----------------------------------------|----------------------------------------|----------------------------------------|
|                                       | Orbitals                             |                                                   | Incident plane//[1-10]                                  |                                        | Incident plane//[001]                  |                                        | Incident plane//[1-10]                                 |                                        | Incident plane//[001]                  |                                        |
|                                       | Ti                                   | O                                                 | P(E)                                                    | S(O)                                   | P(E)                                   | S(O)                                   | P(E)                                                   | S(O)                                   | P(E)                                   | S(O)                                   |
| $P_{\pi 1}$                           |                                      | O <sub>1,4</sub> , 2py,<br>O <sub>2,3</sub> , 2px | E( $\checkmark$ )<br>E( $\checkmark$ )                  | E( $\times$ )<br>E( $\times$ )         | O( $\times$ )<br>O( $\times$ )         | O( $\checkmark$ )<br>O( $\checkmark$ ) | E( $\checkmark$ )<br>E( $\checkmark$ )                 | E( $\times$ )<br>E( $\times$ )         | E( $\checkmark$ )<br>E( $\checkmark$ ) | E( $\times$ )<br>E( $\times$ )         |
|                                       |                                      |                                                   | 0.414                                                   | 0                                      | 0                                      | 0.414                                  | 0.414                                                  | 0                                      | 0.414                                  | 0                                      |
| $P_{\pi 2}$                           |                                      | O <sub>1,6</sub> , 2px,<br>O <sub>3,5</sub> , 2py | N( $\checkmark$ )<br>N( $\checkmark$ )                  | N( $\checkmark$ )<br>N( $\checkmark$ ) | N( $\checkmark$ )<br>N( $\checkmark$ ) | N( $\checkmark$ )<br>N( $\checkmark$ ) | N( $\checkmark$ )<br>N( $\checkmark$ )                 | N( $\checkmark$ )<br>N( $\checkmark$ ) | N( $\checkmark$ )<br>N( $\checkmark$ ) | N( $\checkmark$ )<br>N( $\checkmark$ ) |
|                                       |                                      |                                                   | 0.414                                                   | 0.414                                  | 0.414                                  | 0.414                                  | 0.414                                                  | 0.414                                  | 0.414                                  | 0.414                                  |
| $P_{\pi 3}$                           |                                      | O <sub>2,6</sub> , 2py,<br>O <sub>4,5</sub> , 2px | N( $\checkmark$ )<br>N( $\checkmark$ )                  | N( $\checkmark$ )<br>N( $\checkmark$ ) | N( $\checkmark$ )<br>N( $\checkmark$ ) | N( $\checkmark$ )<br>N( $\checkmark$ ) | N( $\checkmark$ )<br>N( $\checkmark$ )                 | N( $\checkmark$ )<br>N( $\checkmark$ ) | N( $\checkmark$ )<br>N( $\checkmark$ ) | N( $\checkmark$ )<br>N( $\checkmark$ ) |
|                                       |                                      |                                                   | 0.414                                                   | 0.414                                  | 0.414                                  | 0.414                                  | 0.414                                                  | 0.414                                  | 0.414                                  | 0.414                                  |
| <b>Predicted detection efficiency</b> |                                      |                                                   | <b>Incident plane//[1-10]</b><br><b>P:S=0.39 : 0.26</b> |                                        |                                        |                                        | <b>Incident plane//[001]</b><br><b>P:S=0.32 : 0.32</b> |                                        |                                        |                                        |

**Table S7.** The predicted detection efficiency of band gap state. E, O and N correspond to even parity, odd parity, and no parity respectively.

| Band Gap States                       |   | TiO <sub>6</sub> -[110]       |      |                       |      | TiO <sub>6</sub> -[1-10]     |      |                       |      |
|---------------------------------------|---|-------------------------------|------|-----------------------|------|------------------------------|------|-----------------------|------|
| Orbitals                              |   | Incident plane//[1-10]        |      | Incident plane//[001] |      | Incident plane//[1-10]       |      | Incident plane//[001] |      |
| Ti                                    | O | P(E)                          | S(O) | P(E)                  | S(O) | P(E)                         | S(O) | P(E)                  | S(O) |
| 3d <sub>xy</sub>                      |   | E(√)                          | E(×) | E(√)                  | E(×) | E(√)                         | E(×) | E(√)                  | E(×) |
|                                       |   | E(√)                          | E(×) | E(√)                  | E(×) | E(√)                         | E(×) | E(√)                  | E(×) |
|                                       |   | 0.09                          | 0    | 0.09                  | 0    | 0.09                         | 0    | 0.09                  | 0    |
| <b>Predicted detection efficiency</b> |   | <b>Incident plane//[1-10]</b> |      |                       |      | <b>Incident plane//[001]</b> |      |                       |      |
|                                       |   | <b>P:S=0.03 : 0</b>           |      |                       |      | <b>P:S=0.03 : 0</b>          |      |                       |      |

## References:

- (1) Cotton, F. A. *Chemical Applications of Group Theory*; John Wiley & Sons, New York City, **1991**.
- (2) Liu, Y. P.; Qiu, Z. Z.; Carvalho, A.; Bao, Y.; Xu, H.; Tan, S. J. R.; Liu, W.; Neto, A. H. C.; Loh, K. P.; Lu, J. Gate-Tunable Giant Stark Effect in Few-Layer Black Phosphorus. *Nano. Lett.* **2017**, *17*, 1970-1977.
- (3) Zhang, Z., et al. Direct Observation of Band Gap Renormalization in Layered Indium Selenide. *ACS. Nano.* **2019**, *13*, 13486-13491.
- (4) Fischer, S.; Martín-Gago, J. A.; Román, E.; Schierbaum, K. D.; de Segovia, J. L. The valence-band electronic structure of clean and Pt-covered TiO<sub>2</sub>(110) surfaces studied with photoemission spectroscopy. *J. Electron. Spectros. Relat. Phenomena.* **1997**, *83*, 217-225.
- (5) Hardman, P. J.; Raikar, G. N.; Muryn, C. A.; van der Laan, G.; Wincott, P. L.; Thornton, G.; Bullett, D. W.; Dale, P. A. Valence-band structure of TiO<sub>2</sub> along the  $\Gamma$ - $\Delta$ -X and  $\Gamma$ - $\Sigma$ -M directions. *Phys. Rev. B* **1994**, *49*, 7170-7177.
- (6) Wang, Z., et al. Localized Excitation of Ti<sup>3+</sup> Ions in the Photoabsorption and Photocatalytic Activity of Reduced Rutile TiO<sub>2</sub>. *J. Am. Chem. Soc.* **2015**, *137*, 9146-9152.
- (7) Tisdale, W. A.; Williams, K. J.; Timp, B. A.; Norris, D. J.; Aydil, E. S.; Zhu, X. Y. Hot-Electron Transfer from Semiconductor Nanocrystals. *Science.* **2010**, *328*, 1543-1547.
- (8) Raikar, G. N.; Hardman, P. J.; Muryn, C. A.; van der Laan, G.; Wincott, P. L.; Thornton, G.; Bullett, D. W. VALANCE-BAND STRUCTURE OF TiO<sub>2</sub> ALONG THE  $\Gamma$ - $\Sigma$ -M Line. *Solid State Commun.* **1991**, *80*, 423-426.
